# Supplementary figures and images for: Azasydnone – novel “green” building block for designing high energetic compounds
Source: Royal Society of Chemistry journal article supplement (doi:10.1039/c8ta06895j), 2018-01-01

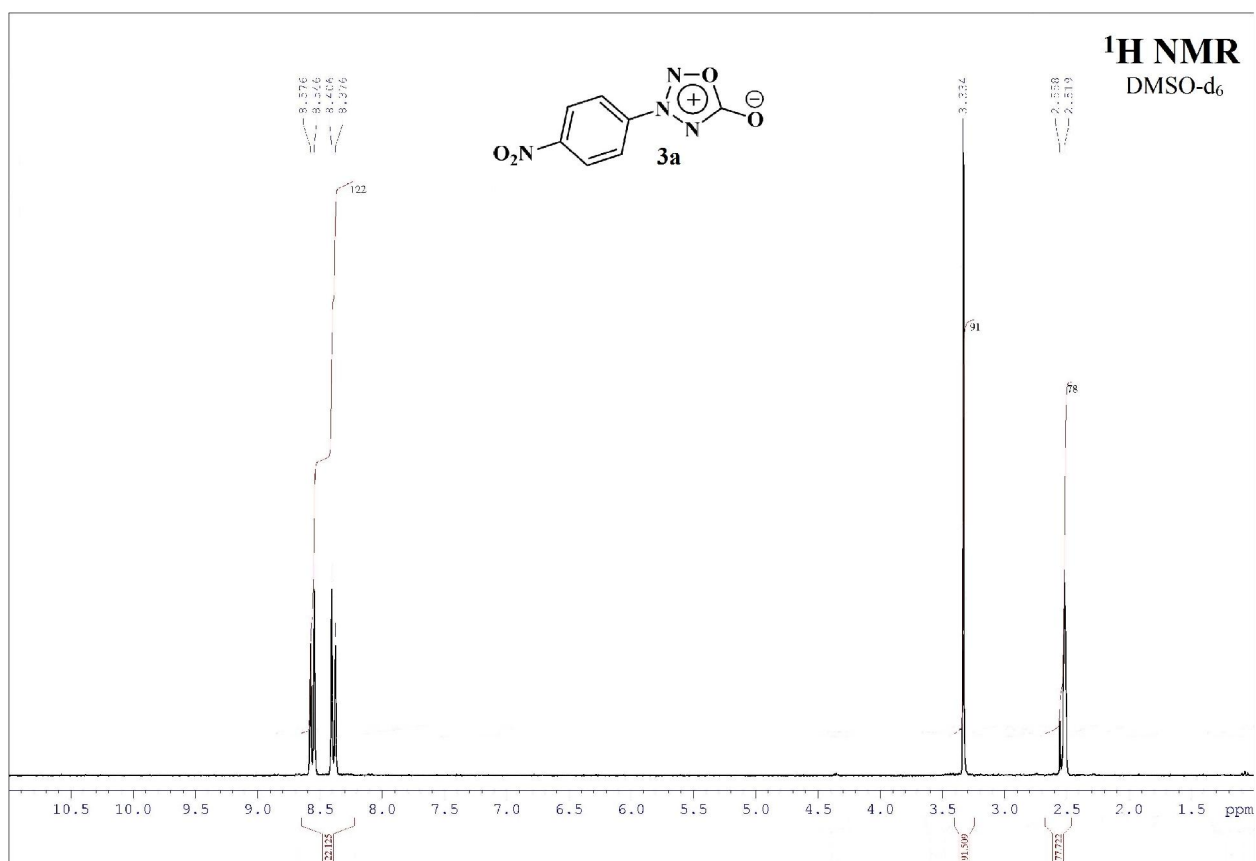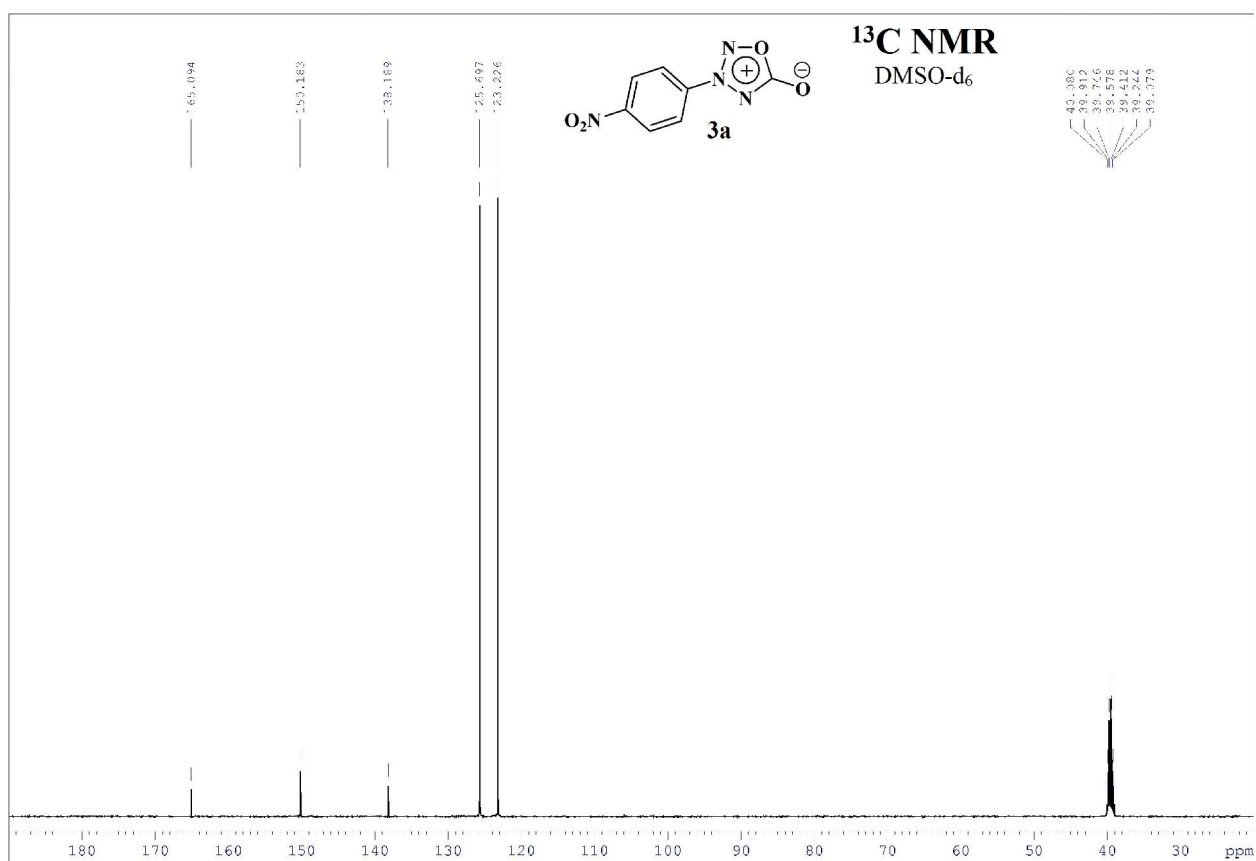

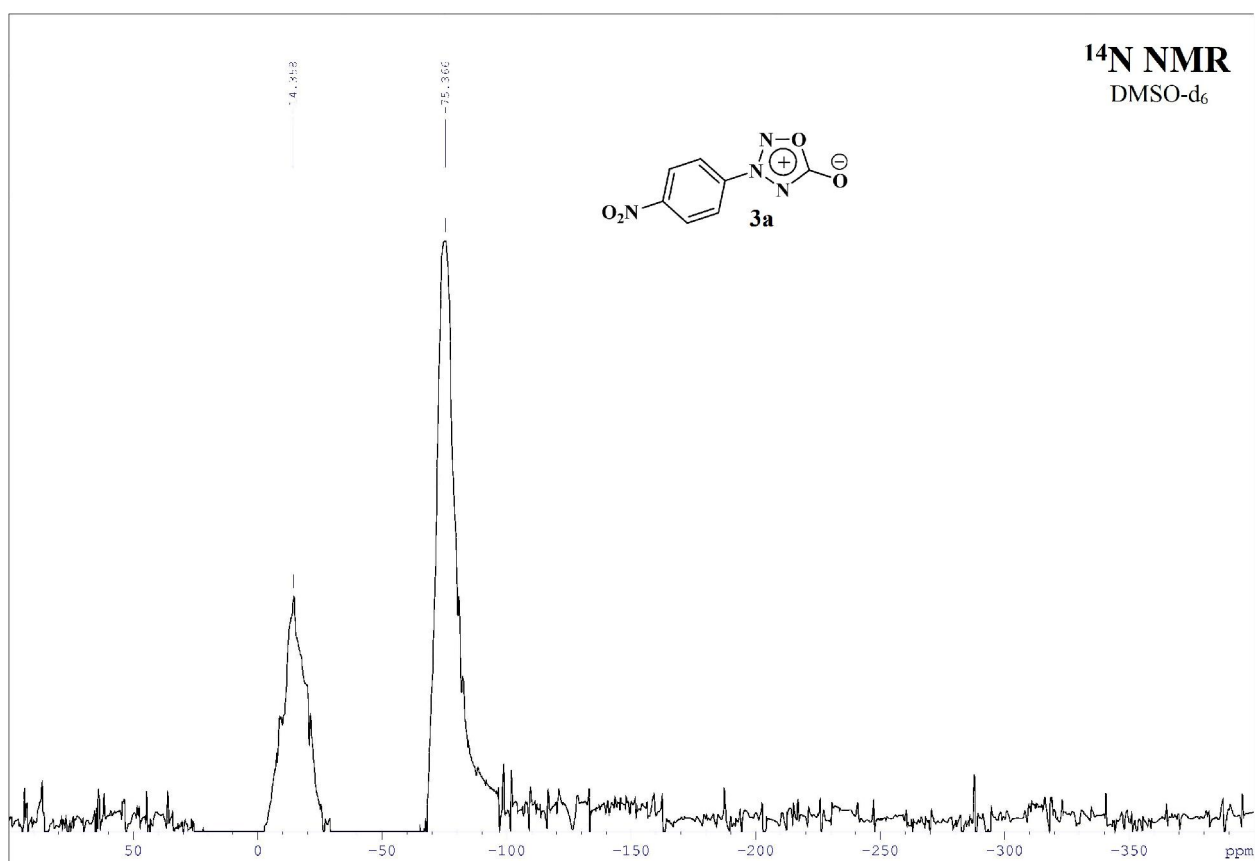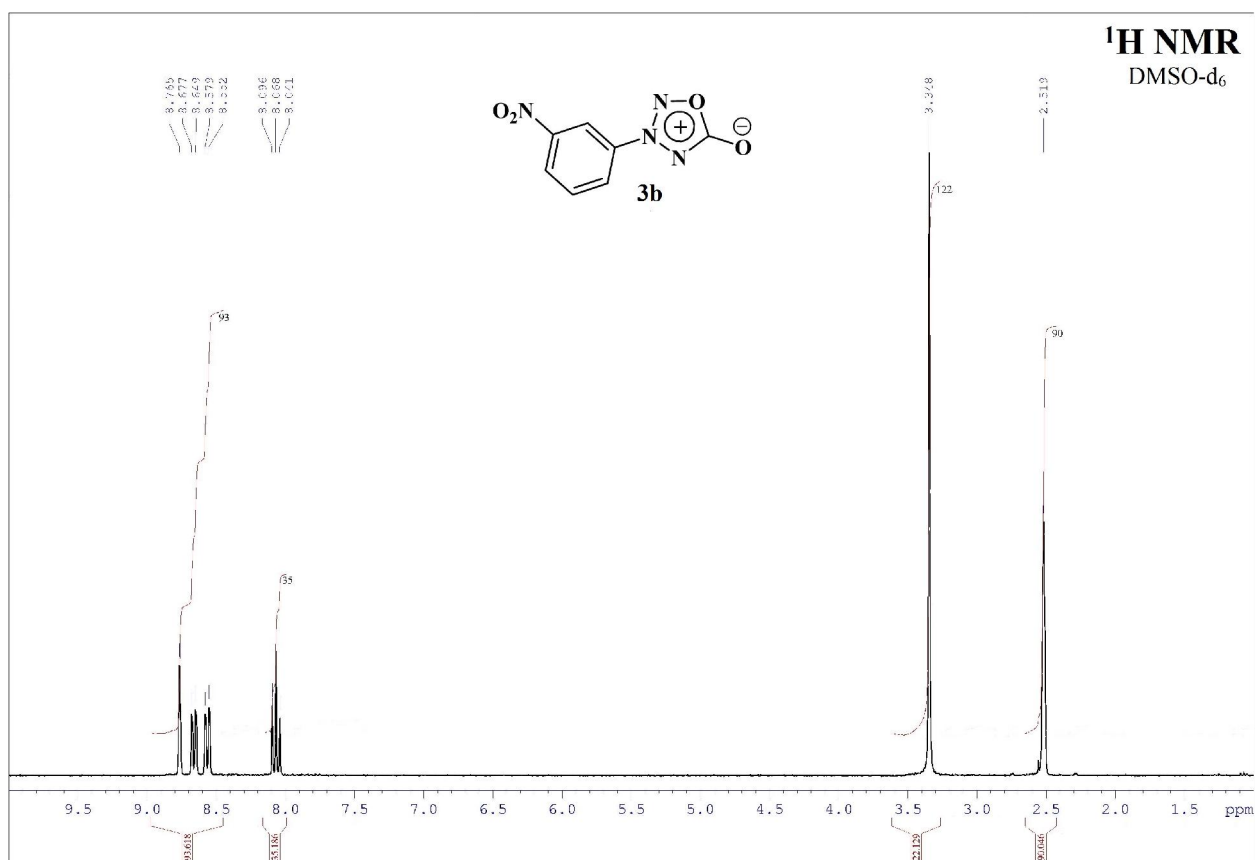

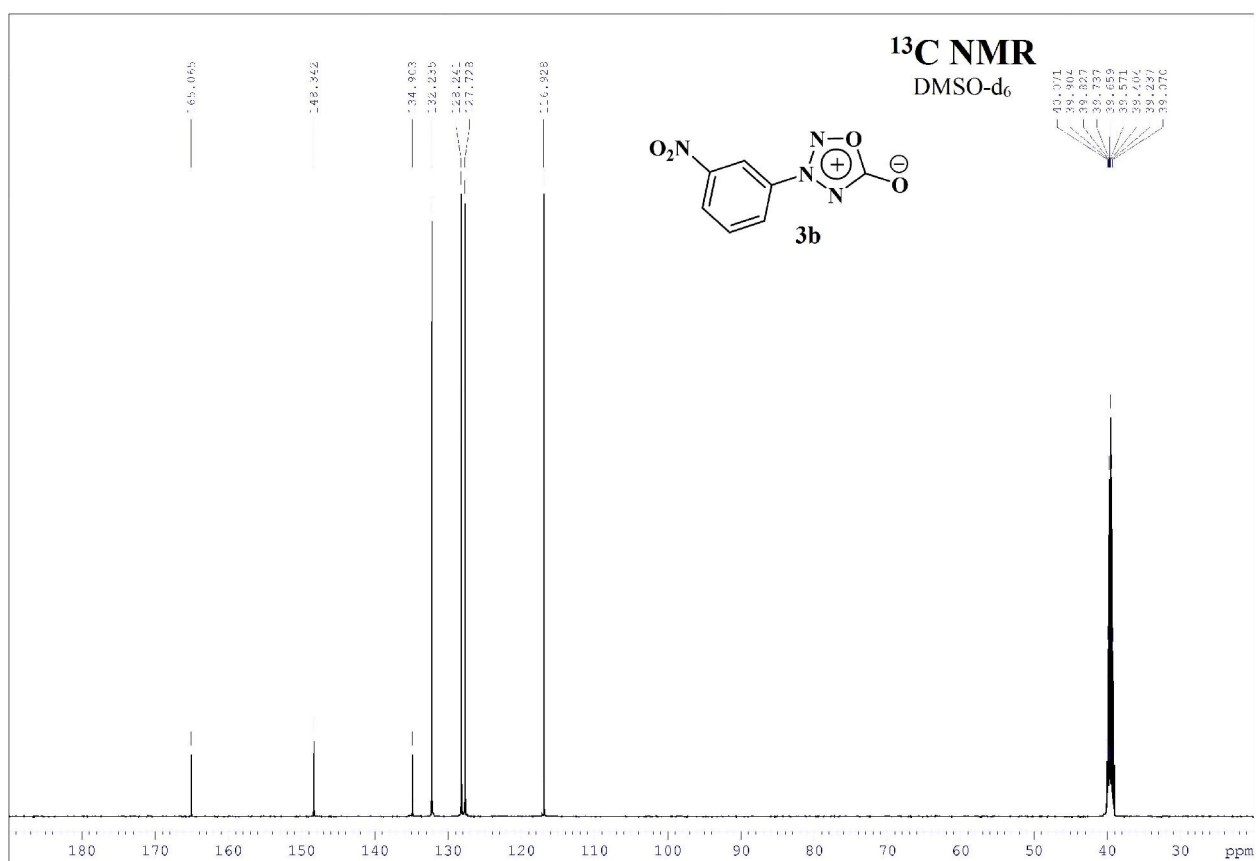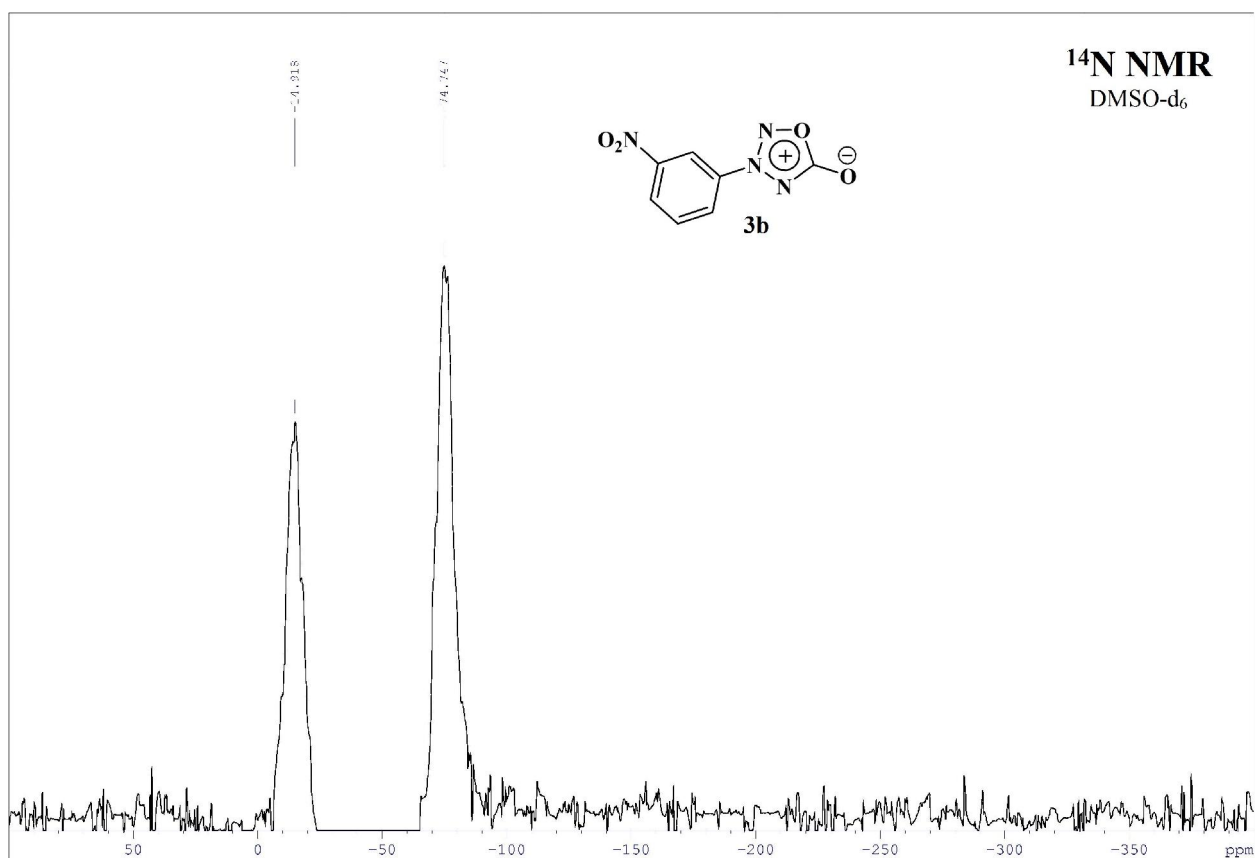

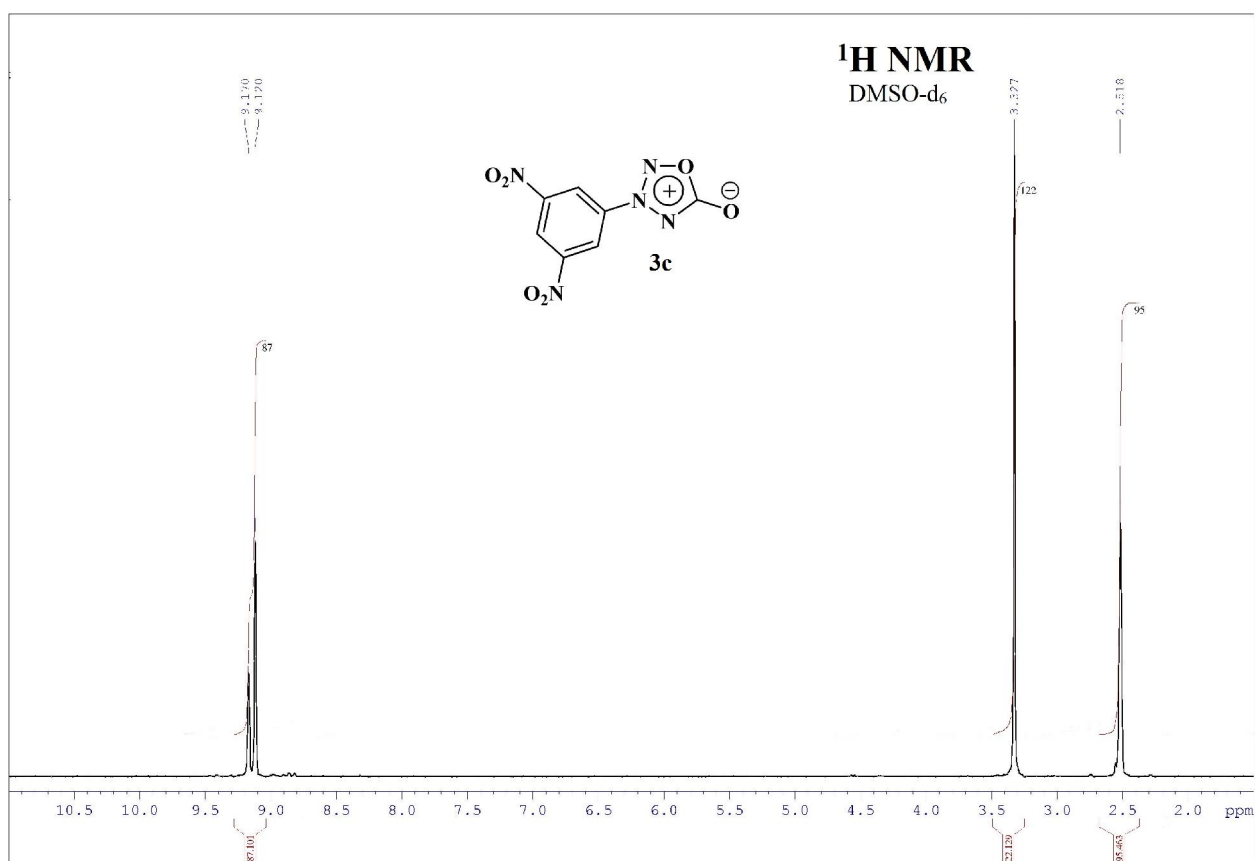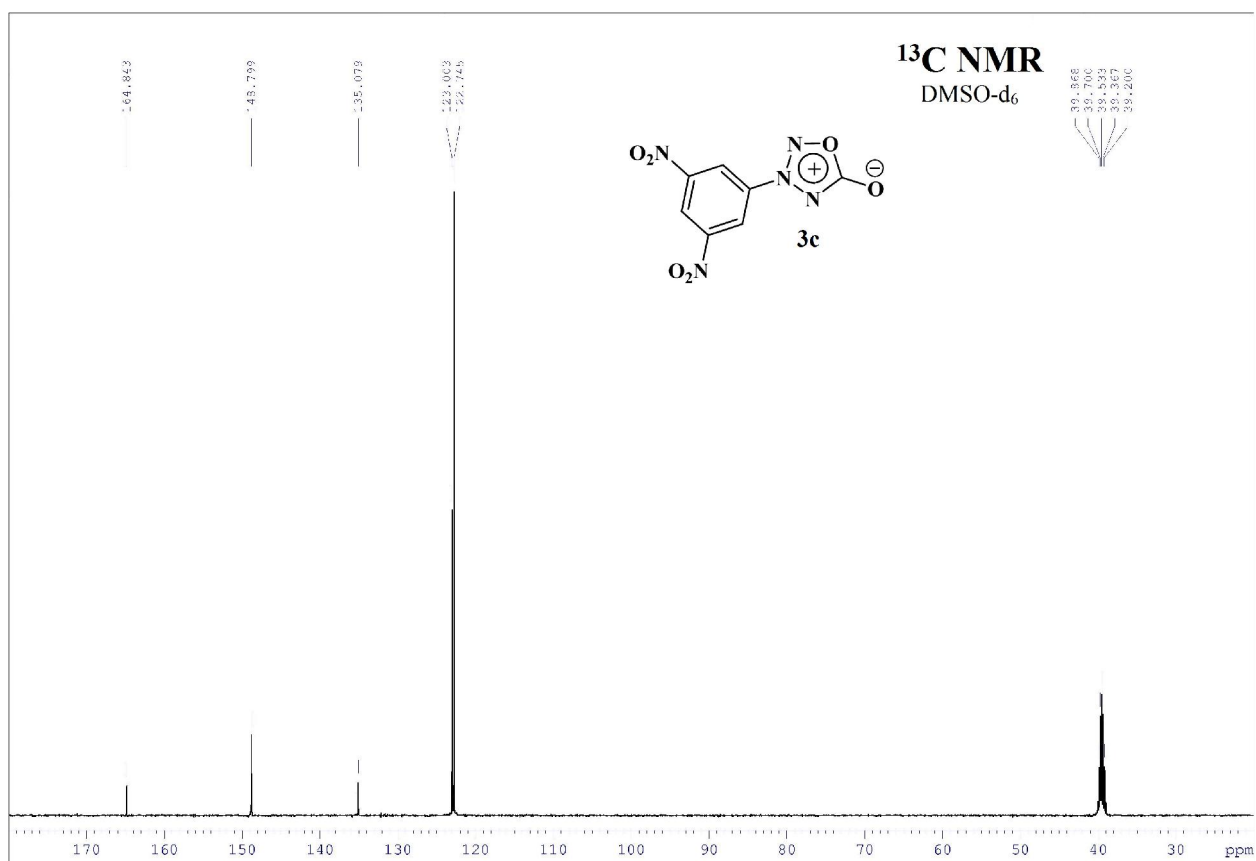



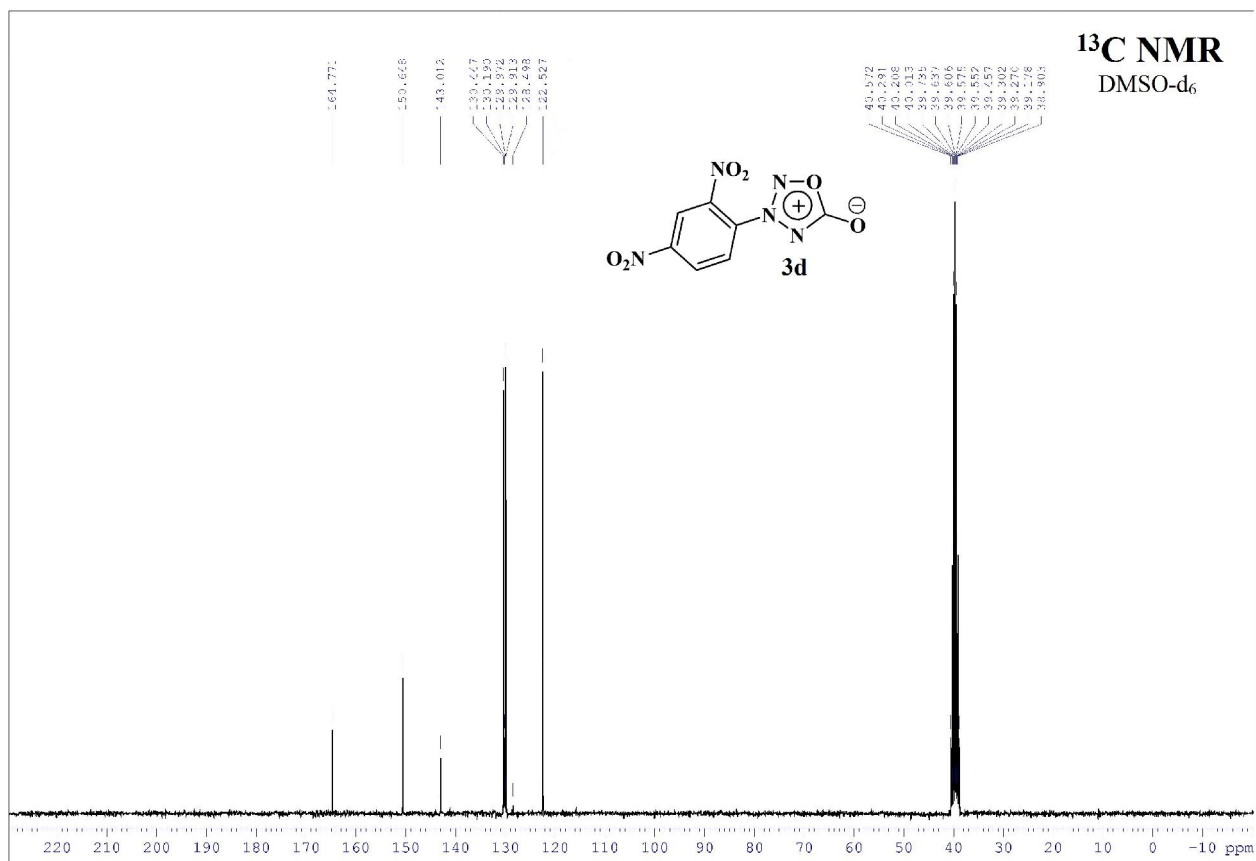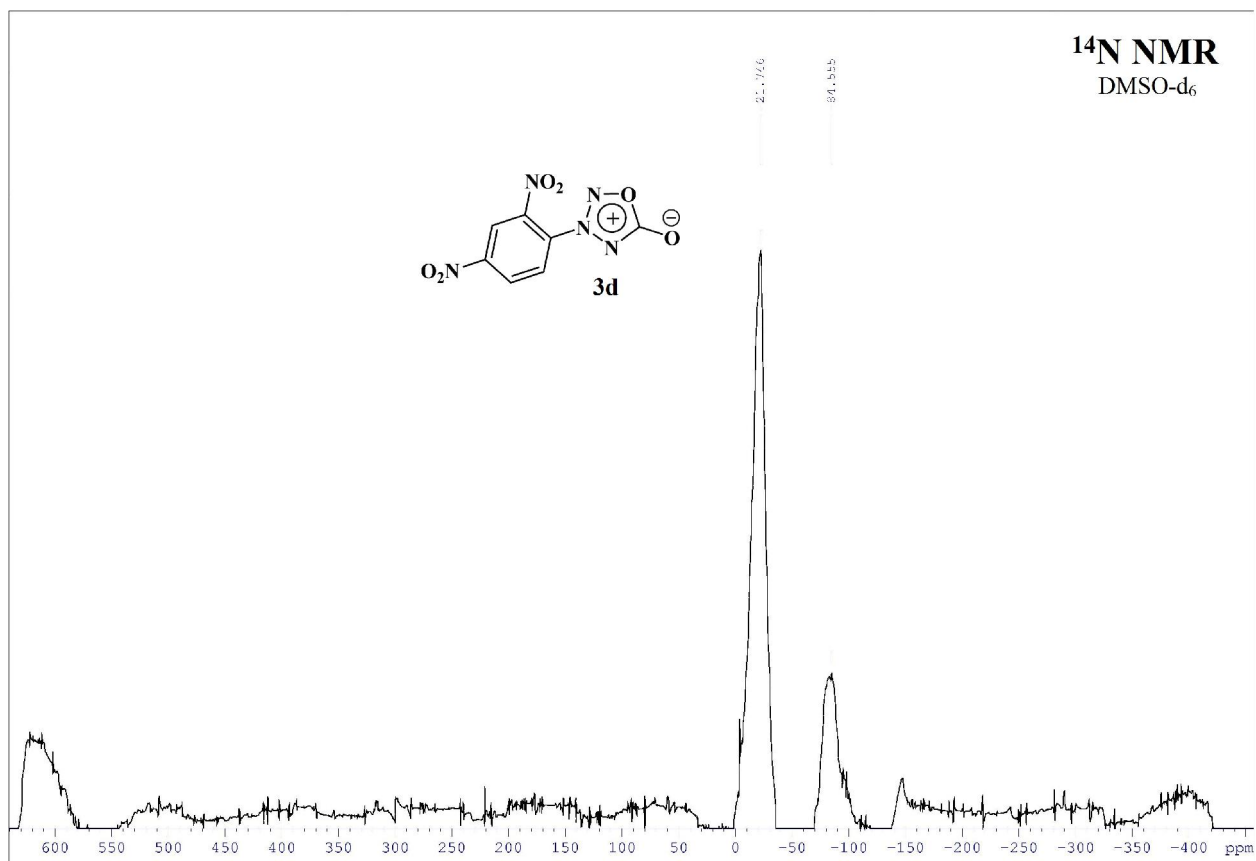

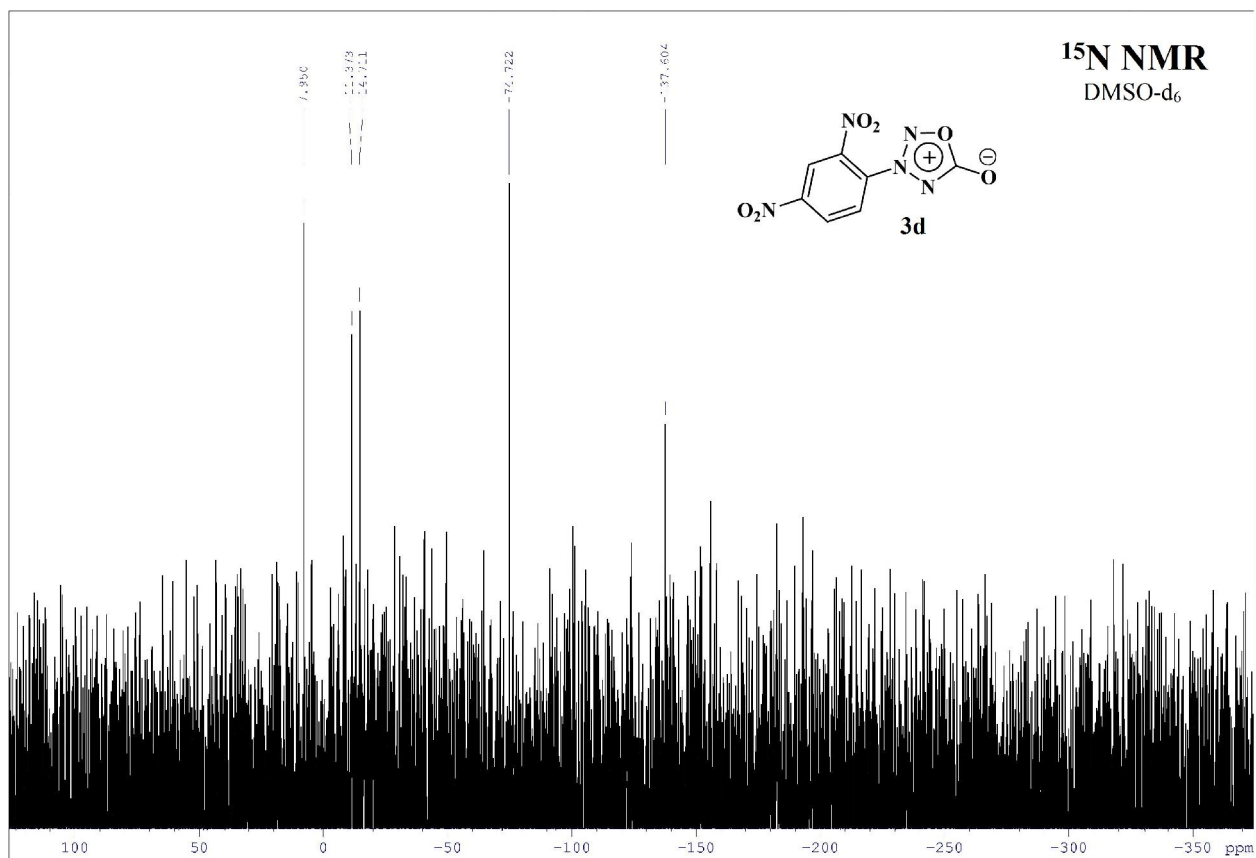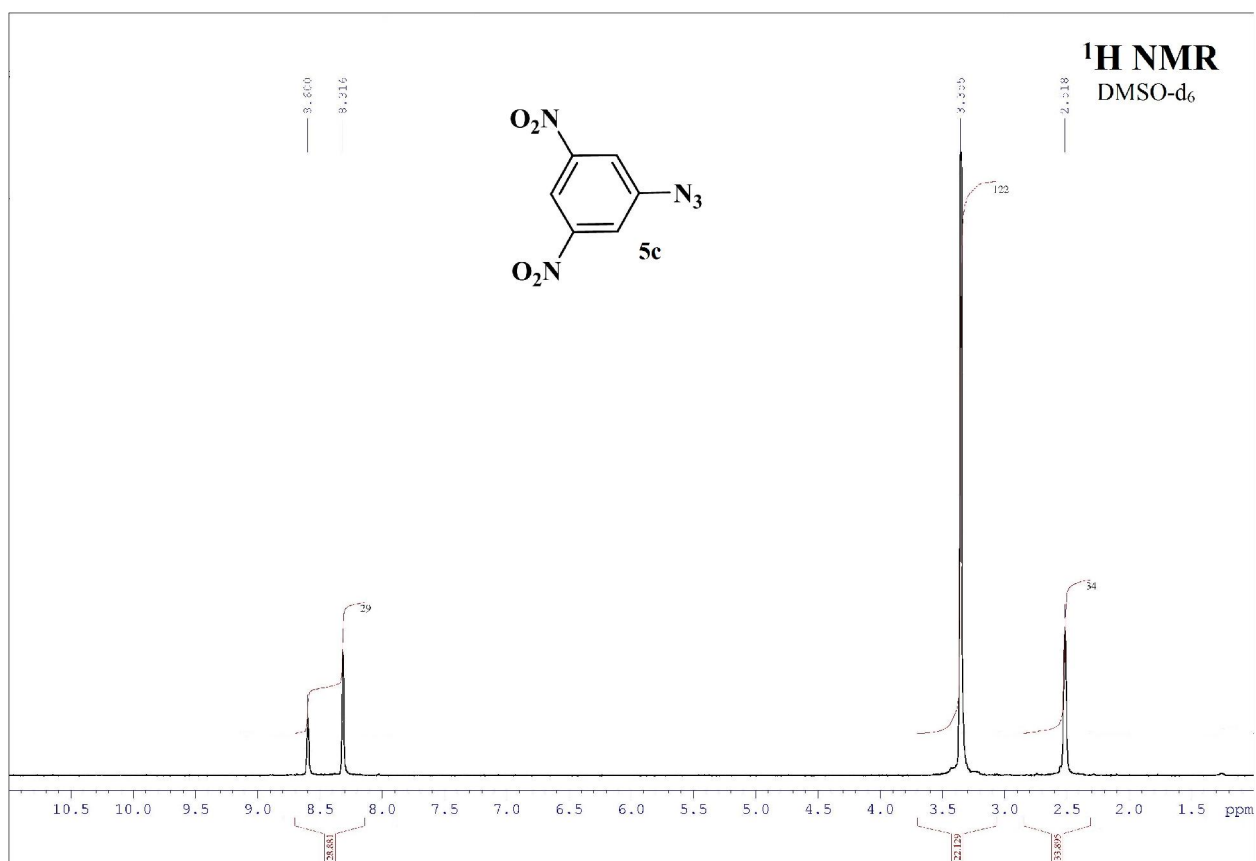

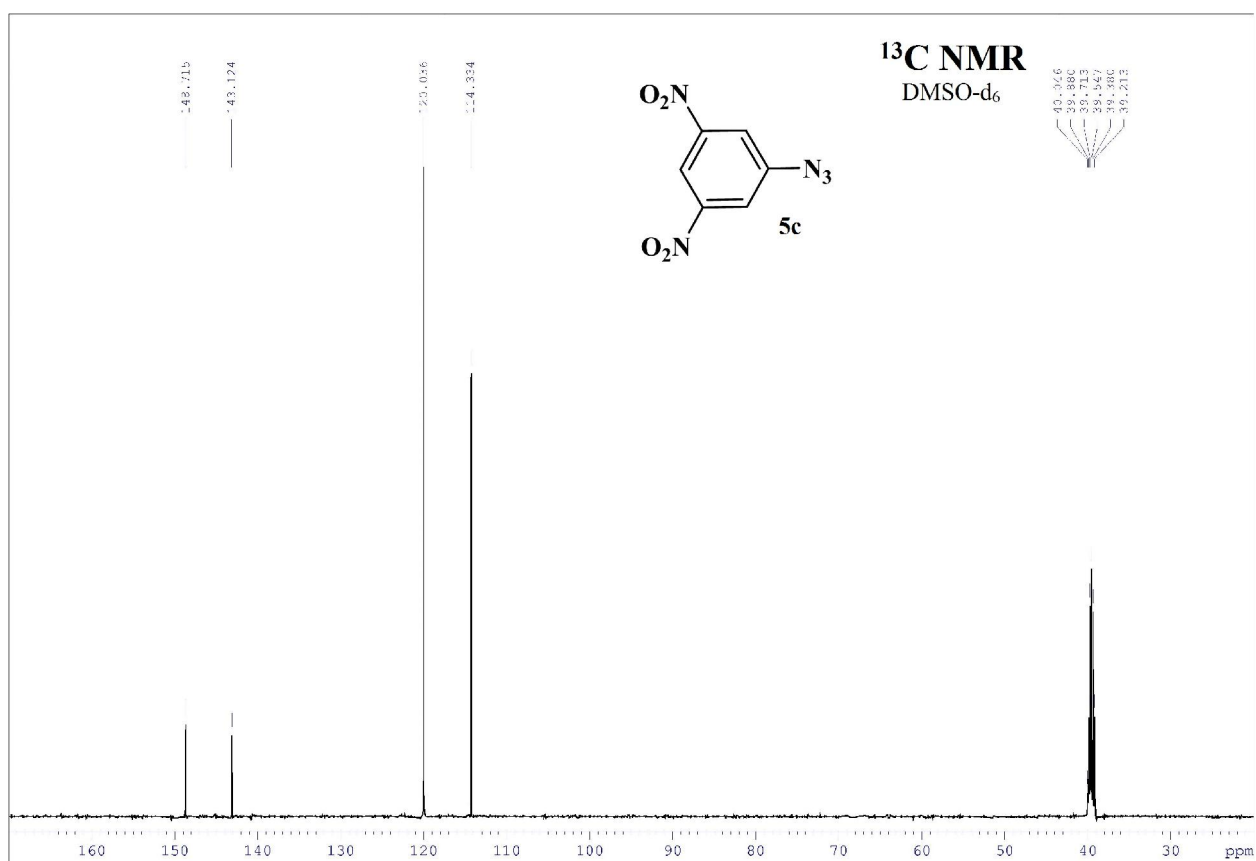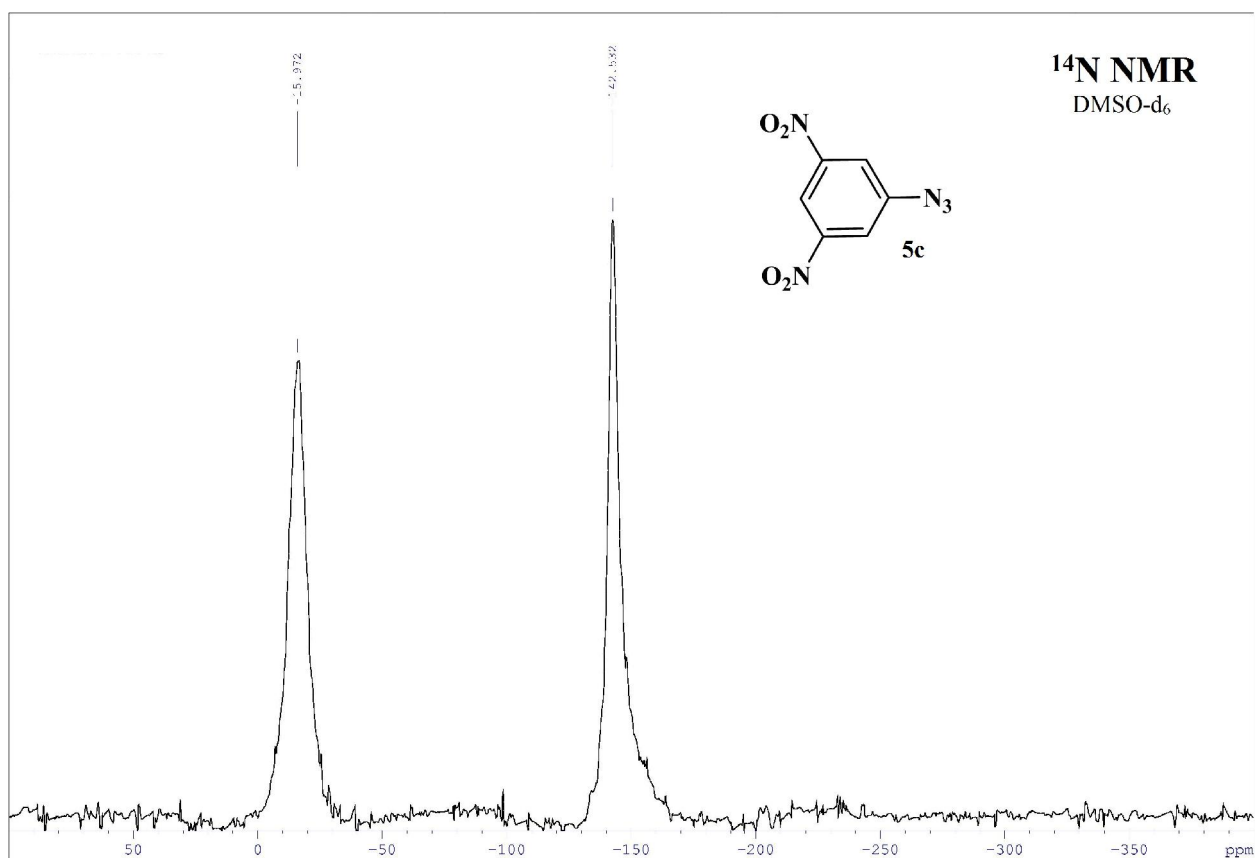

Supplement: c8ta06895j2.pdf [file c8ta06895j2.pdf]
